# Supplementary material
Source: PubMed Central journal article supplement (PMC8501848)
Supplement: pnas.2105367118.sapp.pdf [file pnas.2105367118.sapp.pdf]

## Hupfer et al.

### Supplemental figure legends

#### Figure S1:

- (A) Typical morphological appearance of NIH3T3 cells cultured on soft or stiff hydrogels (phase-contrast images). Scale bar is 50  $\mu\text{m}$ .
- (B) Protein levels of AMPK $\alpha$  and mTOR in different mesenchymal cell types of mouse and human origin. MEF = Mouse embryonic fibroblast; hPSC = Human pancreatic stellate cell.
- (C) Protein levels of AMPK $\alpha$  and mTOR in primary mouse cancer-associated fibroblasts (CAFs) derived from the KPC (*Pdx1-Cre; LSL-Kras<sup>G12D/+</sup>; LSL-Trp53<sup>R172H/+</sup>*) PDAC mouse model and cultured on soft or stiff hydrogels.
- (D) The partial Smoothened agonist Cyclopamine (10  $\mu\text{M}$ , 48h) induces AMPK $\alpha$  activation in NIH3T3 cells cultured on soft/stiff hydrogels.
- (E) Stability of mTOR protein in NIH3T3 cells. Quantification of data depicted in figure 1 J. Shown is the mean  $\pm$ SD of n=3 experiments.

#### Figure S2:

- (A) Knock-down efficiency (qPCR) upon transfection of the indicated siRNAs in MEFs cultured on plastic. Control siRNA (siCon) was set to 1.
- (B) *Integrin* mRNA expression in MEF cells as determined by qPCR (n=1).
- (C) Effect of the indicated siRNA transfections on *Prkaa1* (encoding AMPK $\alpha$ 1) and *Prkaa2* (encoding AMPK $\alpha$ 2) mRNA levels in MEF cells cultured on plastic. The samples with knock-down of *Itgav* are highlighted. Shown is the mean  $\pm$ SD of n=2 independent experiments.
- (D) Immunofluorescence analysis of ITGAV (red) expression in myCAF (upper panel,  $\alpha$ SMA, green) and iCAF (lower panel, PDGFR $\alpha$ , green) populations in human PDAC tissue. Nuclei are stained blue. Scale bar is 25  $\mu\text{m}$ . Pictures are maximum intensity projections of 3D-deconvoluted images.
- (E) Examples of low/absent or high ITGAV expression (brown) in spindle-shaped stromal CAFs. Scale bar is 50  $\mu\text{m}$ .
- (F) Quantification of ITGAV expression (ranked as absent (0), intermediate (1), strong (2)) in a set of 75 human PDAC cases.

**Figure S3:**

Kaplan-Meier curves (TCGA dataset) of PDAC patients depicting overall survival probability in relation to indicated gene expression (best cut-off by scan, minimum group size of n=40).

**(A)** *ITGA1*

**(B)** *ITGA3*

**(C)** *ITGA5*

**(D)** *ITGA7*

**(E)** *ITGA9*

**(F)** *ITGA11*

**(G)** *ITGB3*

**(H)** *ITGB5*

**(I)** *ITGB8*

**(J)** *PTK2*

**Figure S4:**

- (A)** Knock-down efficiency (qPCR) upon transfection of the indicated siRNAs in MEFs cultured on plastic. Control siRNA (siCon) was set to 1. Shown is the mean  $\pm$ SD of n=2 independent experiments.
- (B)** Quantification of AMPK $\alpha$  and mTOR protein abundance as assessed by Western blotting in siRNA-transfected MEFs. Cells were cultured on plastic. Shown is the mean  $\pm$ SD of n=3 independent experiments.
- (C)** Immunoblot depicting changes in phospho-AMPK levels upon transfection with the indicated pools of siRNAs and subsequent culture on soft/stiff hydrogels. Shown is one of n=2 independent experiments.
- (D)** Immunoblot depicting changes in phospho-AMPK levels upon treatment with PF-573228 (FAK inhibitor = FAKi (10  $\mu$ M)) while culturing on soft/stiff hydrogels. Shown is one of n=2 independent experiments.
- (G)** Black-and-white 3D-deconvoluted wide-field fluorescence images (maximum intensity projections) of Phalloidin/DAPI-stained NIH3T3 cells cultured on plastic. Concentrations were: Cytochalasin D: 1  $\mu$ M (8h); Blebbistatin: 10  $\mu$ M (8h), Y-27632: 10  $\mu$ M (8h). Scale bar is 10  $\mu$ m.
- (H)** Quantification of NIH3T3 Western blot results (mean  $\pm$ SD of n=3-4 independent experiments) from cells as depicted in (E). Cyt D=Cytochalasin D; Blebbi=Blebbistatin.
- (I)** Immunofluorescence analysis of transiently transfected EGFP-PRKAA1 (green) in NIH3T3 cells. Cells were cultured on glass slides and treated with DMSO, FAK inhibitor (FAKi: PF-573228, 10  $\mu$ M) or ITGAV inhibitor (CWHM-12, 500 nM). Focal adhesions were marked by staining of endogenous phospho-Paxillin (P-Paxillin, red). Pictures are maximum intensity projections of 3D-deconvoluted images.

**Figure S5:**

- (A)** Quantification of LC3-I and LC3-II in NIH3T3 cells as depicted in Fig. 3A. Shown is the mean of n=2 experiments.
- (B)** NIH3T3 cells stably expressing LC3B-EGFP. Cells were cultured in full 10% FBS-containing medium or in serum-starvation medium (0.5% FBS).
- (C)** Quantification of the results depicted in panel (B). Shown is the mean diameter of LC3B-EGFP spots per cell. Each dot represents one cell.
- (D)** Quantification of LC3B-EGFP fluorescence in stably expressing NIH3T3 cells cultured on soft or stiff matrices. Shown is the mean EGFP intensity per cell. Each dot represents the mean fluorescence per cell calculated from one field of view each (encompassing 16-51 cells). In total, more than 200 cells were measured.
- (E)** Staining of endogenous LC3AB (green) in NIH3T3 cells cultured on soft/stiff matrices. Shown is a confocal image. Scale bar is 10  $\mu\text{m}$ . Nuclei appear in blue.
- (F)** Quantification of endogenous LC3AB fluorescence intensity in NIH3T3 cells cultured on soft or stiff matrices. Shown is the mean fluorescence intensity per cell. Each dot represents the mean fluorescence per cell calculated from one field of view each (encompassing 37-72 cells). In total, more than 460 cells were measured.
- (G)** Quantification of phagosome diameter as determined by electron microscopy of NIH3T3 cells cultured on soft/stiff hydrogels.

**Figure S6:**

- (A)** ITGAV and phospho-ACC<sup>S79</sup> (pACC) immunohistochemistry (brown) of human PDAC specimen. Scale bars are 50  $\mu$ m.
- (B)** Correlative quantification of stromal ITGAV and stromal pACC staining in a set of n=75 human PDAC tissues. Each red dot represents one patient. Scores were ranked based on stromal IHC signals being absent (0), intermediate (1) or strong (2).
- (C)** Proposed stiffness-dependent signaling flow to autophagy and lipid droplets. FA=Fatty acid.
- (D)** Oil-Red O staining of matrigel-embedded mouse pancreatic stellate cells treated with DMSO or ACC inhibitor (PF-05175157, 10  $\mu$ M, 48h).
- (E)** Quantification of Oil-Red O content in mPSCs embedded in matrigel and treated with either DMSO or the ACC inhibitor (ACCi) PF-05175157 (10 $\mu$ M) for 2d (as shown in (B)). Shown is the mean  $\pm$ SD of two independent experiments.
- (F)** *In vitro* myCAF polarization of mPSCs as determined by measuring the expression of four different myCAF marker genes. The ACC inhibitor (ACCi) PF-05175157 was used at a concentration of 10  $\mu$ M (2d). Shown is the mean  $\pm$ SD of n=4 independent experiments.
- (G)** *In vitro* iCAF polarization of mPSCs as determined by measuring the expression of four different myCAF marker genes. The ACC inhibitor (ACCi) PF-05175157 was used at a concentration of 10  $\mu$ M (2d). Shown is the mean  $\pm$ SD of n=3-4 independent experiments.
- (H)** Heatmap depicting the correlation between the expression of indicated *Integrin* genes and the gene set '*regulation of autophagy*' (related to Fig. 4B). The data set comprises microdissected epithelial and stromal material from n=66 human PDAC patients each.
- (I)** Heatmap depicting the correlation between the expression of indicated *focal adhesion* genes and the gene set '*regulation of autophagy*' (related to Fig. 4B). The data set comprises microdissected epithelial and stromal material from n=66 human PDAC patients each.
- (J)** Cell growth assay of luciferase-tagged human Patu8988T PDAC cells cultured alone or together with human PSCs on soft or stiff hydrogels (4d). Shown is the mean  $\pm$ SD of one representative experiment measured in triplicate of a total of n=3 independent experiments.

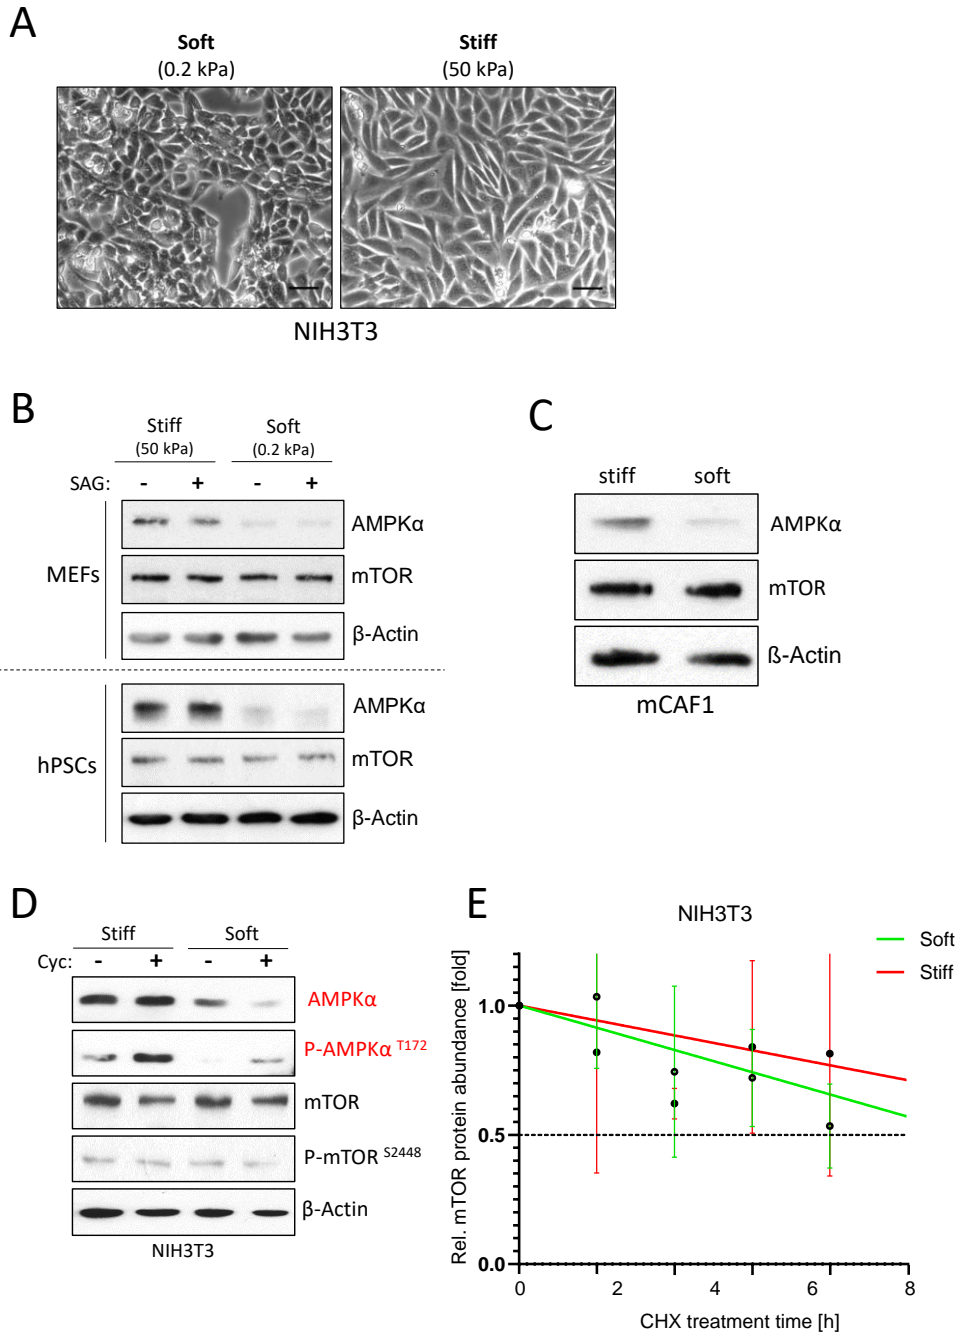

- Figure S1 -

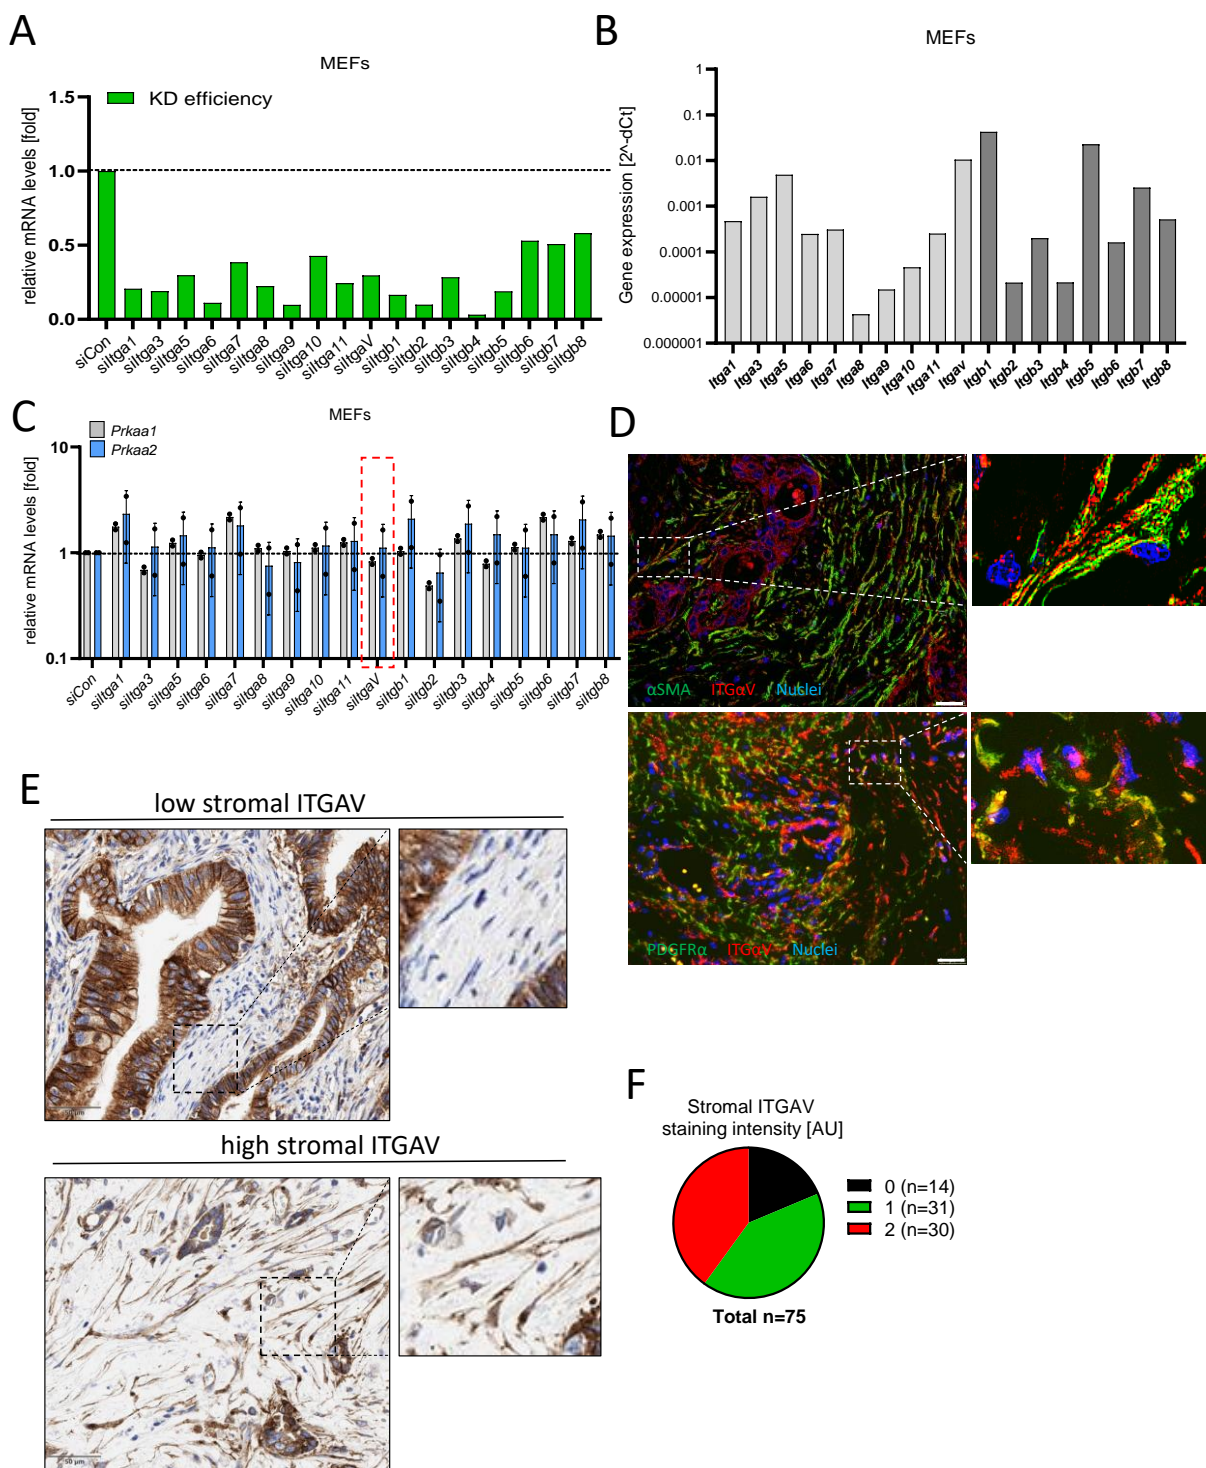

- Figure S2 -

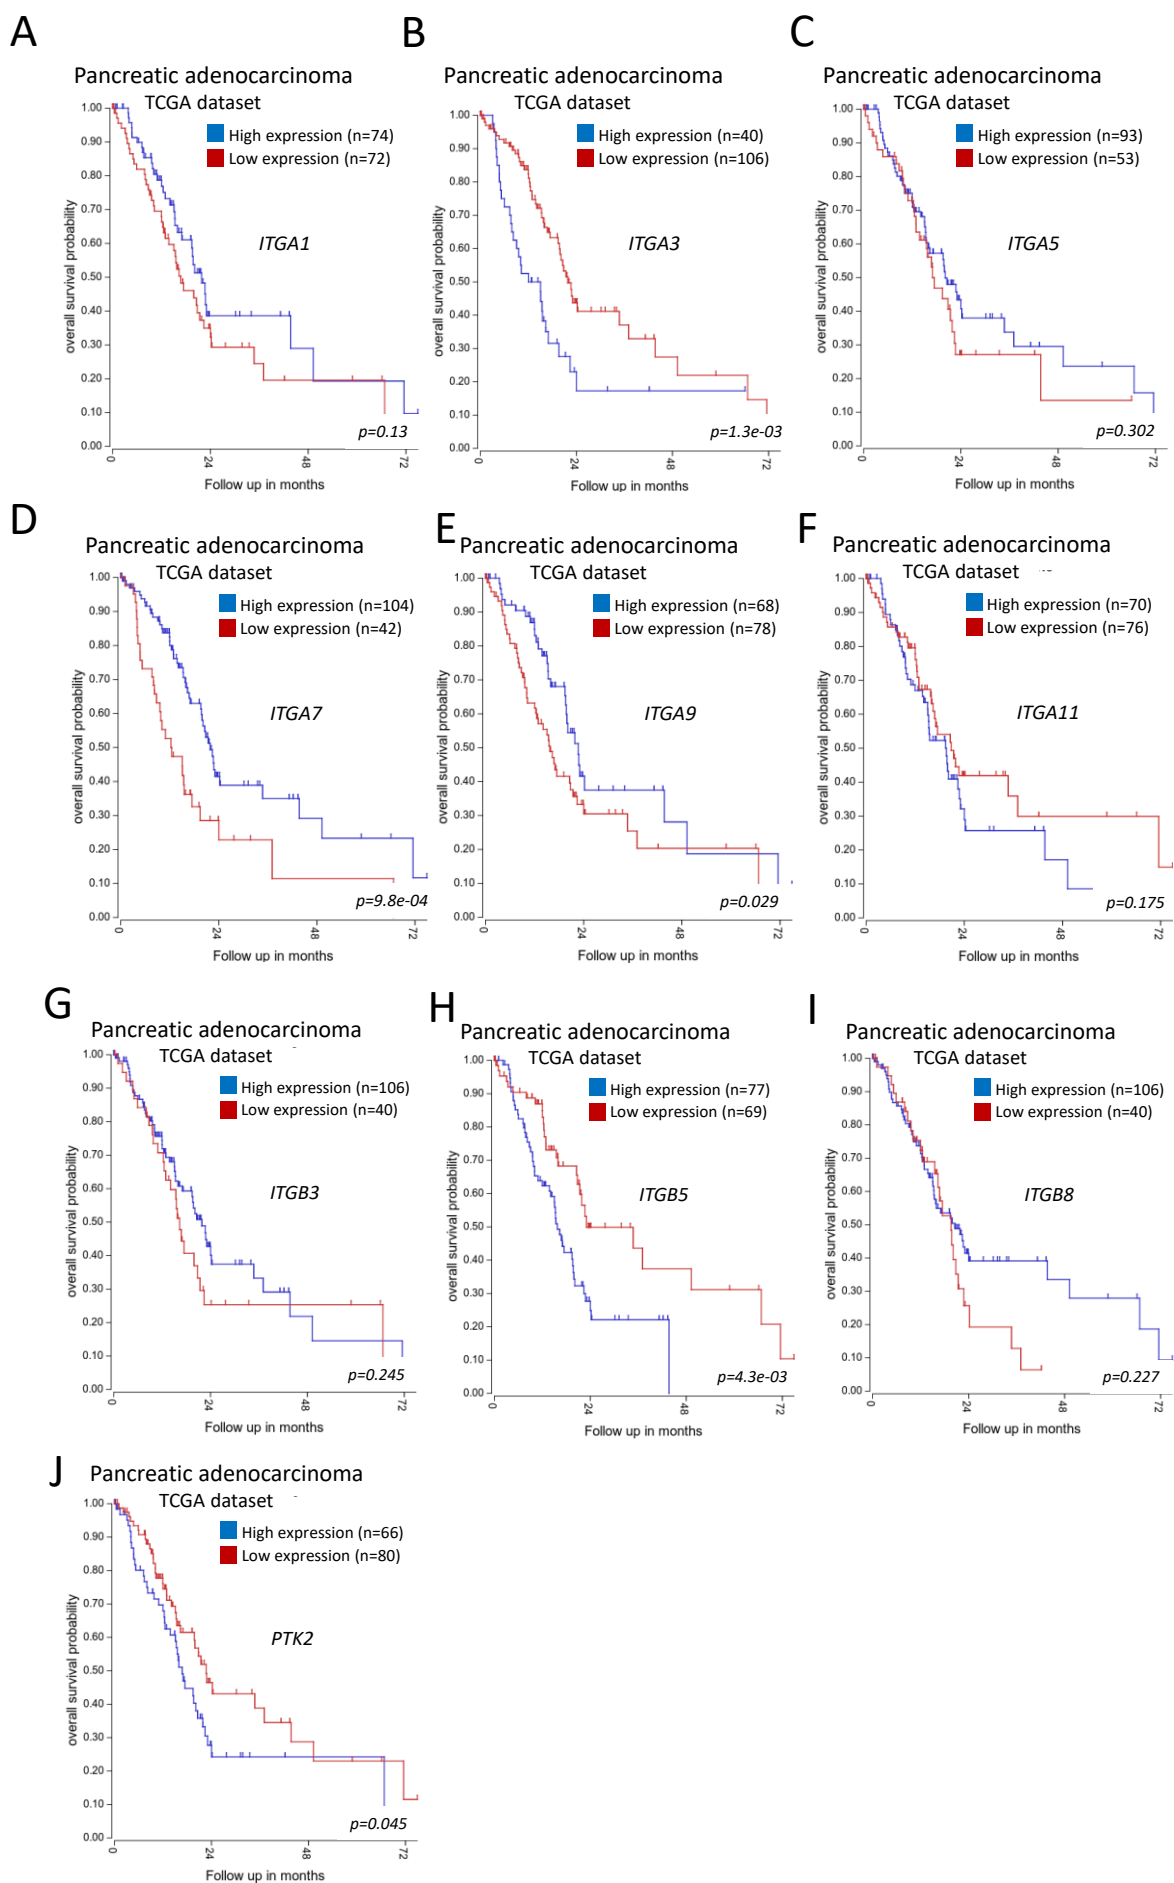

- Figure S3 -



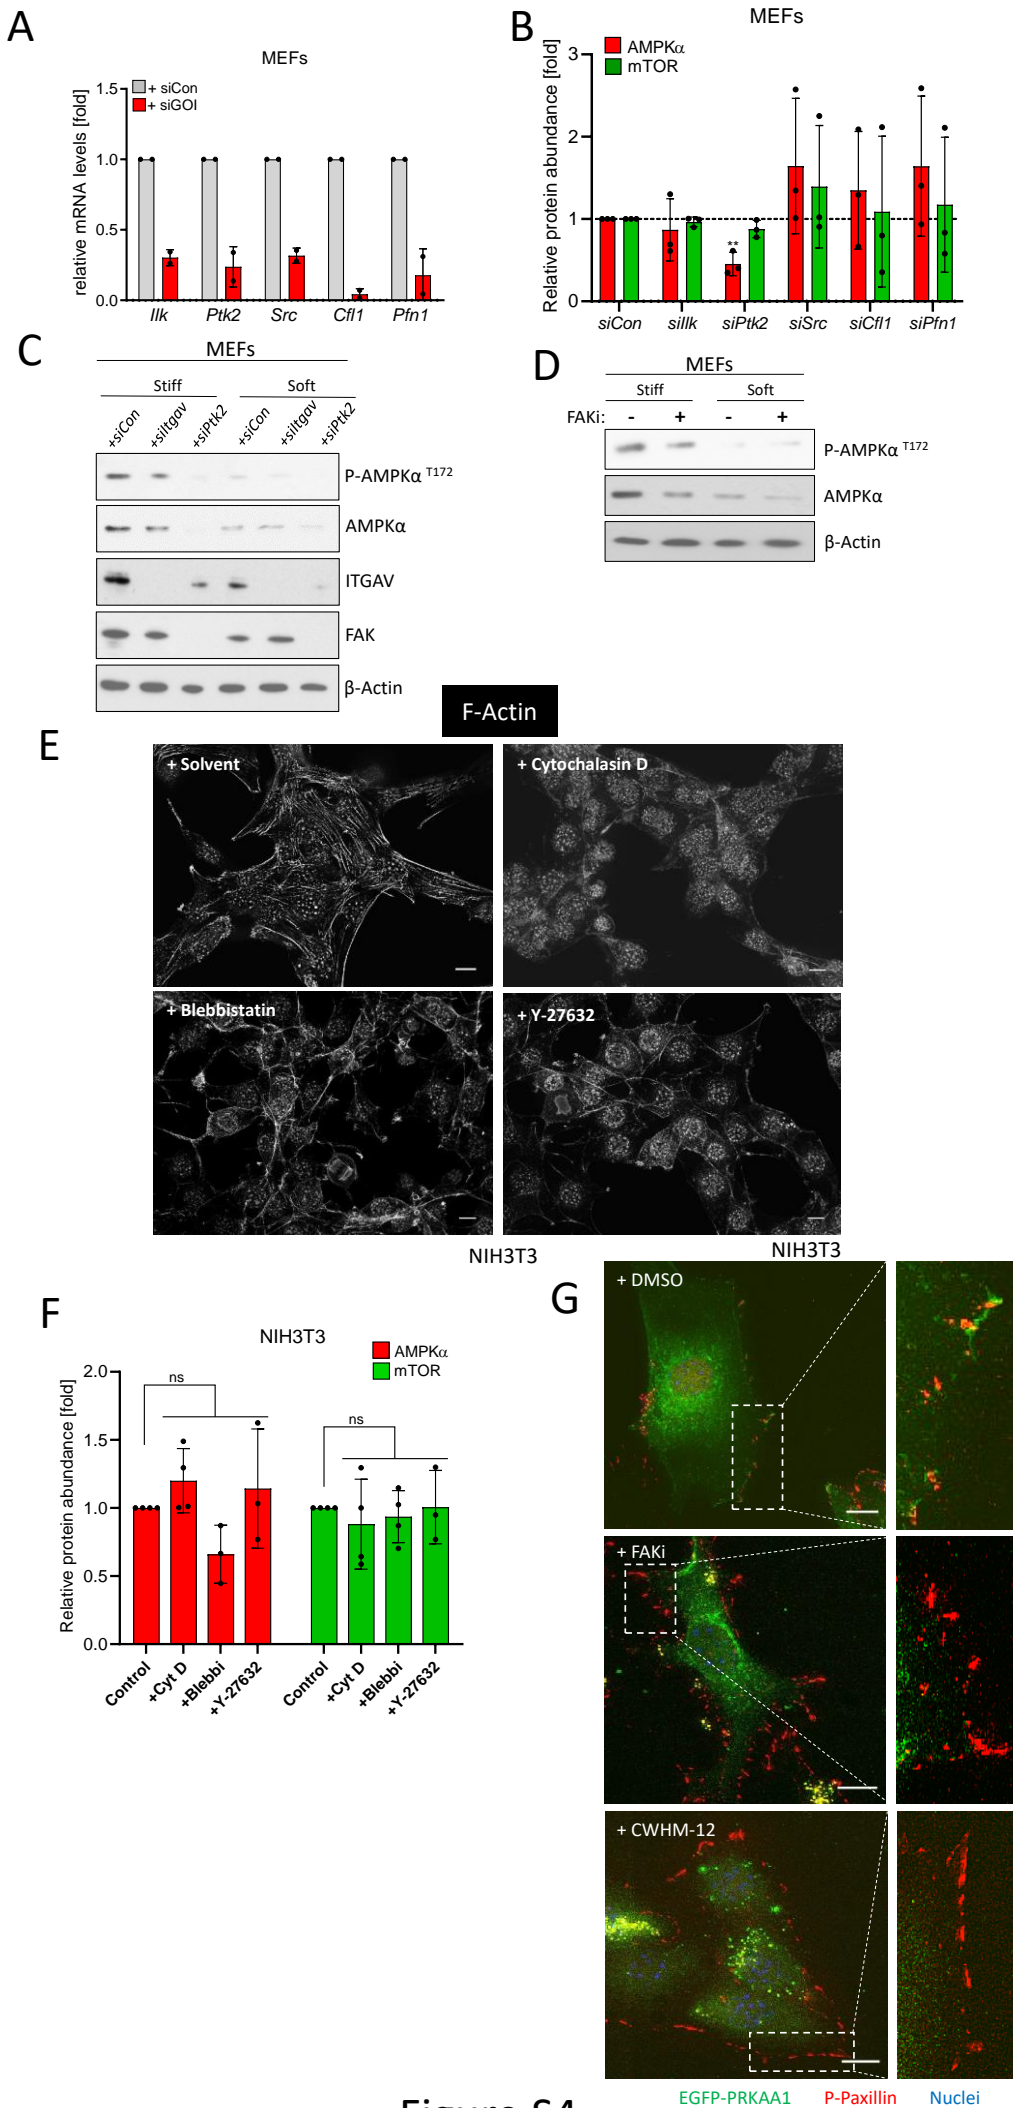

- Figure S4 -

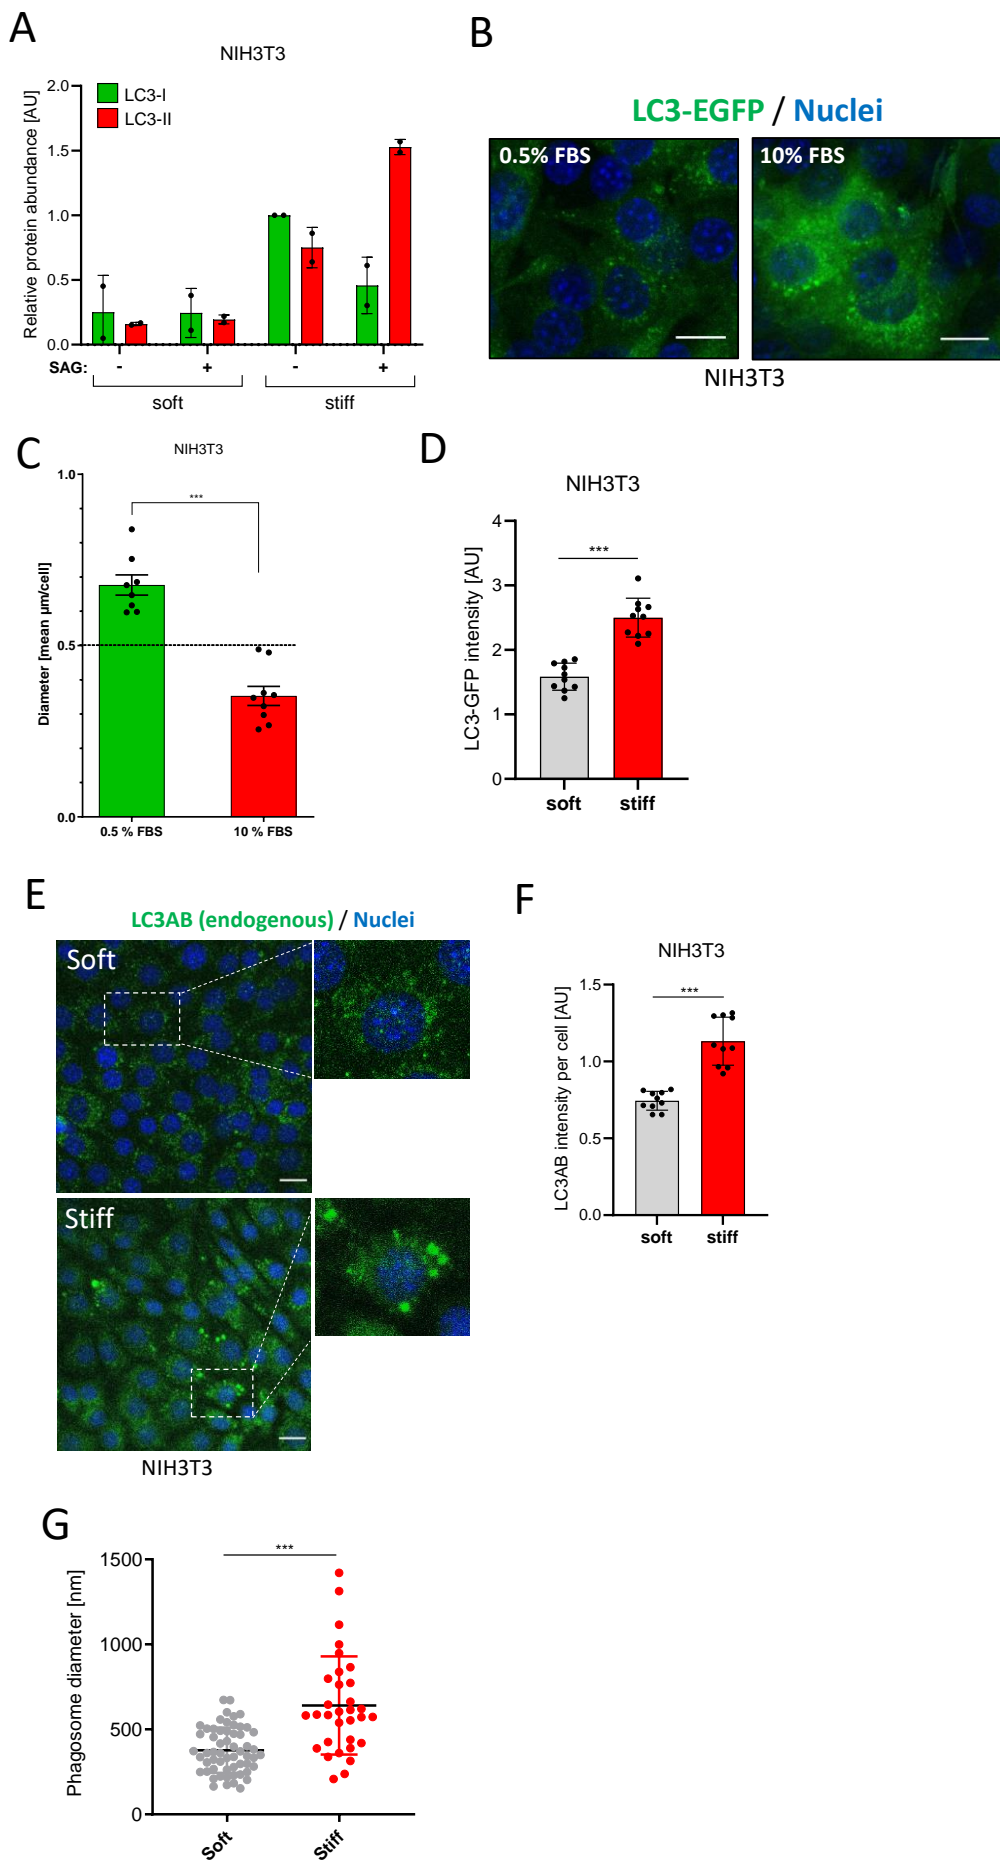

- Figure S5 -

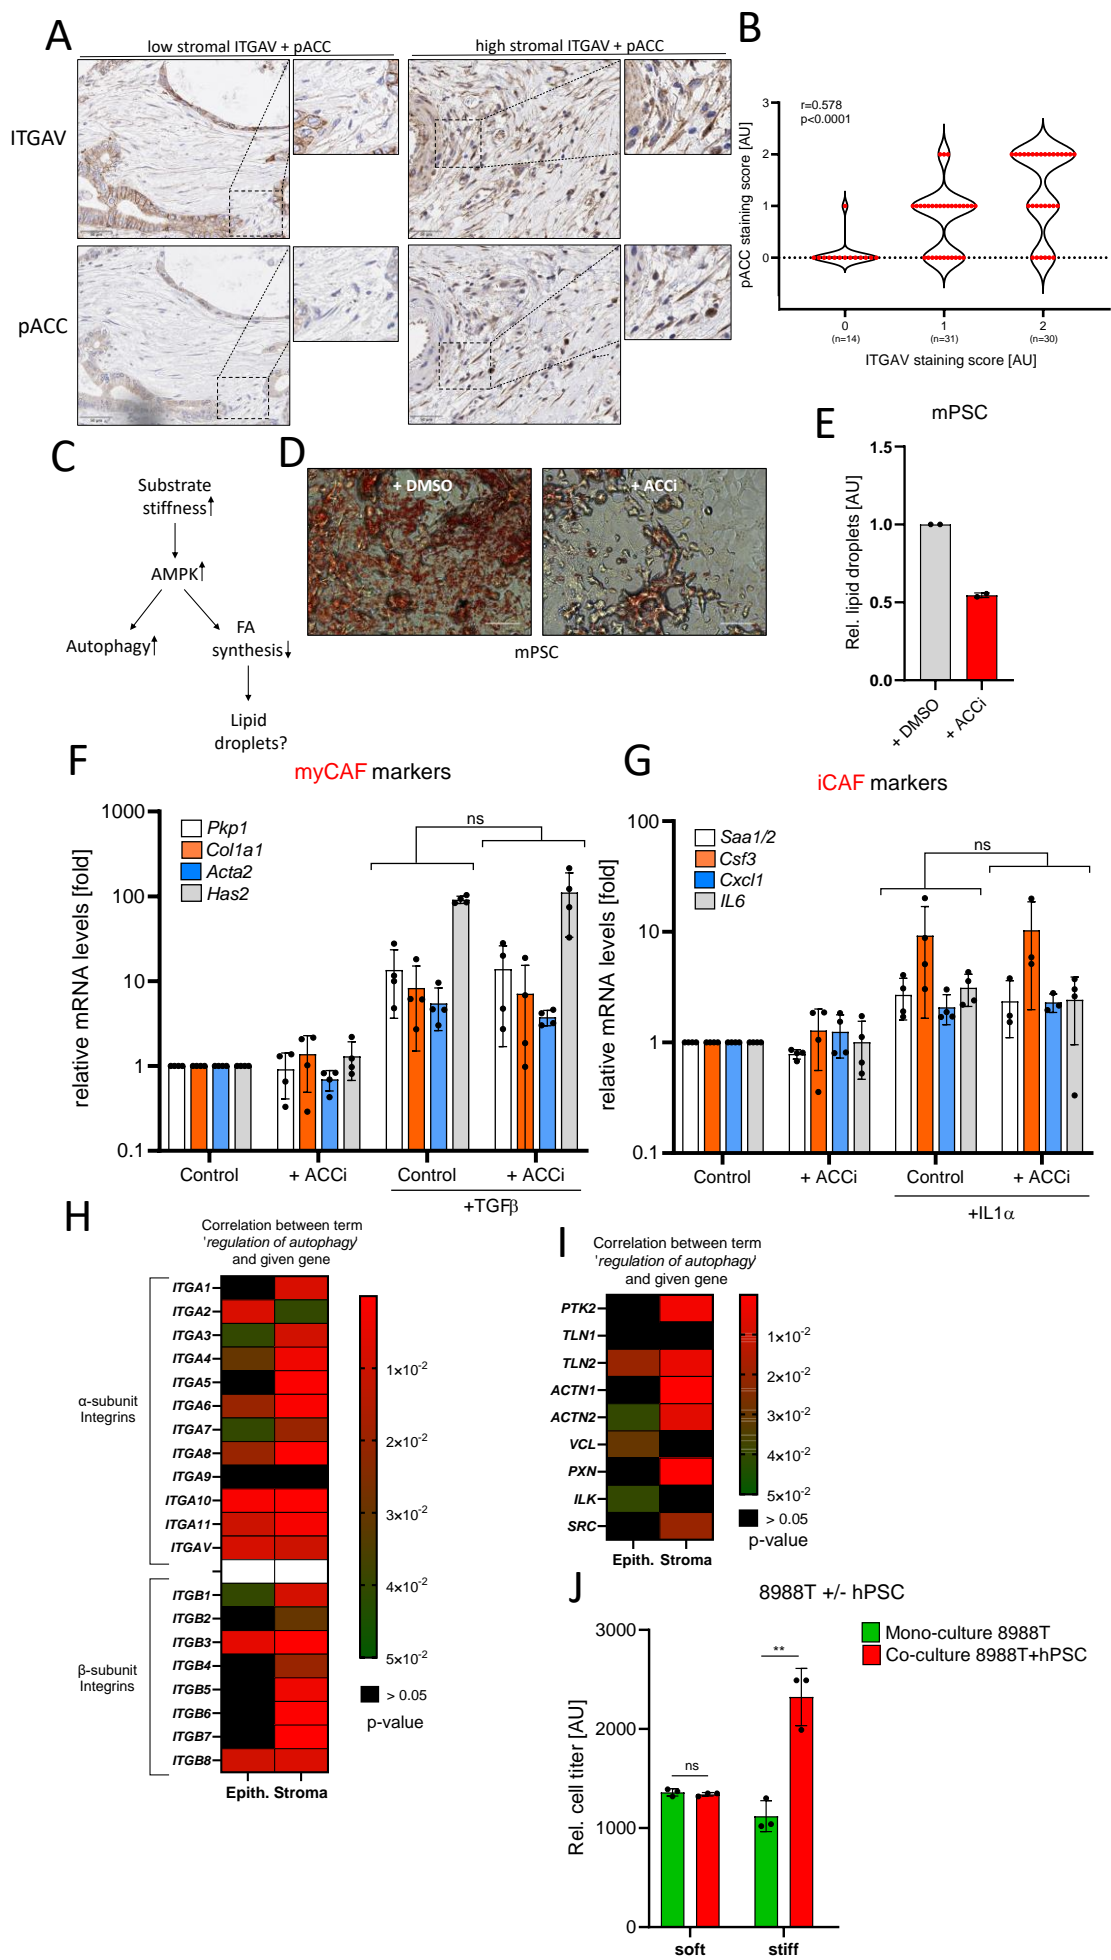

- Figure S6 -

## Hupfer et al.

### Supplemental methods

#### Cell lines

NIH3T3 and Panc1 cell lines were purchased from CLS and Patu8988T cells from DSMZ. Immortalized human (hPSC1) and mouse PSCs (mPSC4) were kindly obtained from Matthias Löhr (1) and Albrecht Neese (2), respectively. MEF cells were kindly provided by Wade Bushman (3). All cell lines were cultured in Dulbecco's Modified Eagle Medium (DMEM (high Glucose plus Glutamine and Pyruvate), Invitrogen) supplemented with 10% fetal bovine serum (FBS) and 1% Penicillin/ Streptomycin at 37°C with 5% CO<sub>2</sub>. If not otherwise stated, serum concentrations were reduced to 0.5% during experiments for all cell types. All cells were regularly checked for mycoplasma contamination.

#### Reagents

Cells were cultured on Collagen I-coated polyacrylamide hydrogels of an elastic modulus of either 0.2 or 50 kPa (Matrigen Petrisoft/Softslip, Cell Guidance Systems). Inhibitors were purchased from the following companies: SelleckChem: PF-573228 (FAKi); Biomol/Cayman: PF-05175157 (ACCi), Y-27632, Bafilomycin A1, Cyclopamine, Cycloheximide; Merck/Millipore: SAG; Adipogen: MG132; Sigma: Cytochalasin D, Blebbistatin.

#### Generation of stable cell lines

PaTu8988T cells were transfected with PGK-Luc (Firefly luciferase driven by PGK promoter) and co-transfected with pEF-MCS (= empty pEF6/V5-His (Invitrogen)) using TransIT-2020 (Mirus Bio) according to the manufacturer's protocol. Cells were subsequently selected with Blasticidin (Capricorn Scientific GmbH) at a concentration of 5 µg/ml.

NIH3T3 cells were transfected with pMRX-IP-GFP-LC3-RFP (LC3B-EGFP; Addgene #84573) using TransIT-2020 (Mirus Bio) according to the manufacturer's protocol. Cells were selected with Puromycin (PAA Laboratories GmbH) at a concentration of 2 µg/ml.

#### *Itgav* knockout cell line via CRISPR/Cas9

For generating *Itgav* knockout mPSC4 cells the CRISPR/Cas9 gene editing system was used (target sequence underlined): Primers mltgaV\_Crispr1\_s (5'-CACCGTGGAGTTTAAGTCCCACCAG) and mltgav\_Crispr1\_as (5'-AAACCTGGTGGGACTTAACTCCAC) were annealed and cloned into the BbsI site of pU6-(BbsI)-CBh-Cas9-T2A-mCherry vector (Addgene: #64324). The KO cells were generated according to a strategy described in (4). To this end, the mPSC4 cell line was transfected with the cloned plasmid (pU6-mltgav\_Crispr1), pTia-2A-Hygro (kindly provided by Till Adhikary) and empty pU6-(BbsI)-CBh-Cas9-T2A-mCherry (ratio 1:1:0.5) using Helix-In transfection reagent (Oz Biosciences, OZB-HX10500) for 24h. Subsequently, cells were selected with Hygromycin (VWR International GmbH, J60681.MC) at a concentration of 400 µg/ml until resistant clones appeared. Single cell clones were picked and the knockout was confirmed via Western blot and RT-qPCR.

#### Western blotting

Separation of lysates by SDS-PAGE was followed by subsequent blotting on Immobilon-PVDF membranes (Millipore) and incubation with the respective primary antibody, followed by incubation with an HRP-coupled secondary antibody (Cell signaling Technology). Detection of the HRP signal was performed using Pierce ECL Western Blotting Substrate (Thermo Scientific) according to the manufacturer's protocol.

### **qPCR analyses**

Total RNA was extracted using NucleoSpin RNA II kit (Macherey-Nagel) according to the manufacturer's protocol. cDNA synthesis of 1 µg total RNA was performed using iScript cDNA Synthesis Kit (Biorad) following the manufacturer's guidelines. Quantitative PCR reactions were performed using the Absolute QPCR SYBR Green Mix (ABGene). qPCR reactions were performed on 96 well qPCR plates (ABGene) using either the Mx3000P or Mx3005P qPCR systems (Agilent). Results were calculated as relative mRNA expression ( $2^{-\Delta\Delta Ct}$ ). Data was obtained from at least three independent experiments and is shown as the mean  $\pm$  StDev.

### **Small interfering RNA (siRNA) transfections**

Cells were transfected with 35 nM siRNA (Dharmacon SMARTpools and Qiagen control siRNA (All-Stars siRNA; siCon) using RNAiMax (Invitrogen). For siRNA sequences see enclosed table.

### **Microscopy**

Transfections with pEGFP-PRKAA1 (Addgene #30305) were done on plastic plates using TransIT-2020 (Mirus Bio) according to the manual. 24h later, cells were transferred onto glass cover slips or hydrogels and incubated in 0.5% FBS-containing media for 1-2d. Cells were subsequently fixed with 4% formaldehyde/PBS for 10 min at RT. After washing twice with PBS and permeabilization with 0.5% Triton-X100/PBS at RT for 5 min, hydrogels were blocked with 10% serum/PBS for 1h at RT and washed once with PBS. Primary antibody was diluted in PBS containing 10% serum and 0.1% Saponin and incubated overnight at 4 °C. After washing twice with PBS at RT for 5 min, the hydrogels were incubated with fluorophore-coupled secondary antibodies diluted in PBS containing 10% serum and 0.1% Saponin at RT in the dark for 2 h. After washing twice with PBS for 5 min and rinsing with H<sub>2</sub>O, hydrogels were covered with mounting medium containing DAPI (Vectashield). Microscopy was performed on a Leica TCS SP8 confocal microscope (Leica Microsystems, Wetzlar, Germany).

### ***In vitro* PSC polarization**

PSCs ( $4 \times 10^5$ ) were seeded in a 70µl matrigel drop (Growth Factor Reduced (GFR) Basement Membrane Matrix, Corning, 734-1101) mixed at a 1:1 ratio with DMEM (10 % FBS) on a 3.5 cm suspension plate (Sarstedt). The matrigel was covered with 0.5 % FBS-containing DMEM, treated with ACCi (PF-05175157, 10 µM) and incubated for 48 h. Afterwards, cells were treated with either recombinant human TGF-β1 (Peprotech, #100-21) or recombinant human IL-1α (Peprotech, #200-01A) at a concentration of 2 ng/ml or 1 ng/ml, respectively, followed by an incubation for 48 h. Warm medium was removed and drops were collected in falcon tubes mixed with ice cold DMEM. After centrifugation (400 rpm, 4°C, 10 min) and removing of the medium, cells were resuspended in ice cold DMEM and incubated for 30 min at 4°C. Cells were centrifuged (400rpm, 4°C, 10 min), medium was removed and pellets were frozen at -80°C for later RNA preparation.

### **Oil-Red-O staining and quantification**

Oil Red O staining was performed as described in (5). Briefly, stellate cells were fixed in 10% formaldehyde/DPBS for 10 min at RT and incubated in 60 % Isopropanol at RT for 5 min. The cells were air-dried and incubated with filtered Oil-Red-O solution (Sigma, O0625-25G) diluted in water at a 3:2 ratio (Stock Solution : Water) for 10 min at RT. Afterwards the cells were washed with water and microscopy was performed on a Leica DM3000 microscope (Leica Microsystems, Wetzlar, Germany). For quantification, cells were incubated in 100% isopropanol for 10 min on an Orbital Shaker.

Supernatant was taken and measurement was performed on a Spectra Max 340 microplate reader (Molecular Devices) at an absorbance wavelength of 510 nm.

### **Phalloidin staining**

Cells were seeded on hydrogels and fixed with 4% formaldehyde/PBS for 10 min at RT. After washing twice with PBS, cells were permeabilized with 0.5% Triton-X100/PBS at RT for 5 min and washed twice with PBS. Phalloidin-California Red Conjugate (Biomol, #23103) was diluted 1:1000 in PBS containing 1% Albumin Fraction V (Roth, 8076.1). Cells were incubated with Phalloidin for 20 min at RT. After washing twice with PBS and rinsing with water, hydrogels were covered with mounting medium containing DAPI (Vectashield). Microscopy was performed on a Leica TCS SP8 confocal microscope (Leica Microsystems, Wetzlar, Germany).

### **Immunohistochemistry**

For immunohistochemistry, heat-induced epitope retrieval was performed with EDTA. Staining was performed on a DAKO Autostainer-Plus. After blocking endogenous peroxidase, sections were incubated for 45 minutes with rabbit polyclonal Anti-Phospho-Acetyl-CoA Carboxylase Antibody (1:100; Cell Signaling #3661). Sections were washed and incubated with Dako REAL EnVision HRP Rabbit/Mouse polymer, which reacts with DAB-Chromogen, according to the manufacturer's protocol. The use of patient material (in form of tissue microarrays (TMAs)) was approved by the local ethics committee (Ethics Board University Hospital Marburg). Material on the TMA was from patients suffering from PDAC eligible for surgery. Pathological diagnosis of patient from Fig. 4A: G2 ductal adenocarcinoma of the pancreas, pT2, pN0, L0, V0, Pn0.

### **Transmission electron microscopy (TEM)**

Cells were seeded on hydrogels and incubated for 48 h in growth medium containing 0.5% FBS. Afterwards, cells were washed once with PBS and fixed with 2 % glutaraldehyde (in H<sub>2</sub>O) for at least 1h at RT, followed by processing for TEM (EM core facility Philipps University Marburg).

### **Co-culture assays**

Cells were seeded on hydrogels in a cellular ratio of tumor cells (1/5) and stellate cells (4/5) or as tumor cell monoculture. Cells were treated with Bafilomycin A1 (100 nM) or DMSO and incubated for 4 d in 0% FBS DMEM. Afterwards, cells were lysed in Passive Lysis Buffer (Promega, E1941) and Firefly Luciferase activity was measured using Beetle-Juice reagent (PJK, Kleinblittersdorf, Germany) on an Orion L microplate luminometer (Berthold Detection Systems).

### **Xenograft experiment**

Female athymic nude mice were randomly divided into 3 groups.  $0.5 \times 10^6$  PaTu8988T cells were suspended in a total volume of 200  $\mu$ l of DMEM medium for group 1.  $0.5 \times 10^6$  PaTu8988T cells +  $1 \times 10^6$  mPSC4<sup>WT</sup> cells were suspended in a total volume of 200  $\mu$ l of DMEM medium for group 2.  $0.5 \times 10^6$  PaTu8988T cells +  $1 \times 10^6$  mPSC4<sup>KO</sup> (*Itgav* KO) were suspended in a total volume of 200  $\mu$ l of DMEM medium for group 3. The cell suspensions were injected s.c. at the posterior flank of the mice. Tumor volumes were calculated by the formula  $(\text{length} \times \text{width}^2)/2$ . The length represents the longer axis and the width represents the shorter axis of the tumor. At the experimental endpoint mice were euthanized and tumors were removed. The study was approved by the regional agency on animal experimentation (Regierungspräsidium Giessen).

### Statistics and data availability

Statistical comparisons were made of  $n \geq 3$  experiments using a two-tailed Student's t-test unless otherwise stated. Significances were indicated as ns (not significant)  $p > 0.05$ ,  $*p < 0.05$ ,  $**p < 0.01$ ,  $***p < 0.001$ . Kaplan-Meier curves and gene correlations were done using the R2: Genomics Analysis and Visualization Platform (<http://r2.amc.nl>).

### References

1. R. Jesnowski, D. Furst, J. Ringel, Y. Chen, A. Schrodell, J. Kleeff, A. Kolb, W. D. Schareck, M. Lohr, Immortalization of pancreatic stellate cells as an in vitro model of pancreatic fibrosis: deactivation is induced by matrigel and N-acetylcysteine. *Lab Invest* **85**, 1276–1291 (2005).
2. A. Neesse, M. Wagner, V. Ellenrieder, M. Bachem, T. M. Gress, M. Buchholz, Pancreatic stellate cells potentiate proinvasive effects of SERPINE2 expression in pancreatic cancer xenograft tumors. *Pancreatology* **7**, 380–385 (2007).
3. R. J. Lipinski, M. F. Bijlsma, J. J. Gipp, D. J. Podhaizer, W. Bushman, Establishment and characterization of immortalized Gli-null mouse embryonic fibroblast cell lines. *BMC Cell Biol* **9**, 49 (2008).
4. V. A. Blomen, P. Májek, L. T. Jae, J. W. Bigenzahn, J. Nieuwenhuis, J. Staring, R. Sacco, F. R. van Diemen, N. Olk, A. Stukalov, C. Marceau, H. Janssen, J. E. Carette, K. L. Bennett, J. Colinge, G. Superti-Furga, T. R. Brummelkamp, Gene essentiality and synthetic lethality in haploid human cells. *Science (New York, N.Y.)* **350**, 1092–1096 (2015).
5. D. Ohlund, A. Handly-Santana, G. Biffi, E. Elyada, A. S. Almeida, M. Ponz-Sarvise, V. Corbo, T. E. Oni, S. A. Hearn, E. J. Lee, Chio, II, C. I. Hwang, H. Tiriác, L. A. Baker, D. D. Engle, C. Feig, A. Kultti, M. Egeblad, D. T. Fearon, J. M. Crawford, H. Clevers, Y. Park, D. A. Tuveson, Distinct populations of inflammatory fibroblasts and myofibroblasts in pancreatic cancer. *J Exp Med* **214**, 579–596 (2017).

## Hupfer et al.

### Supplemental material section

#### Primary antibodies

| Antibody                       | Species | Clone | Order #    | Source                    |
|--------------------------------|---------|-------|------------|---------------------------|
| $\beta$ -Actin                 | mouse   | AC-15 | A5441      | Sigma                     |
| AMPK $\alpha$                  | mouse   | F6    | #2793      | Cell Signaling Technology |
| phospho-AMPK $\alpha$ (Thr172) | rabbit  | 40H9  | #2535      | Cell Signaling Technology |
| mTor                           | rabbit  | 7C10  | #2983      | Cell Signaling Technology |
| phospho-mTor (Ser2448)         | rabbit  | D9C2  | #5536      | Cell Signaling Technology |
| phospho-ACC (Ser79)            | rabbit  | D7D11 | #11818     | Cell Signaling Technology |
| FAK                            | rabbit  |       | #3285      | Cell Signaling Technology |
| ITGAV (WB)                     | rabbit  |       | #4711      | Cell Signaling Technology |
| ITGAV (IF+IHC)                 | rabbit  |       | HPA004856  | Sigma/Merck               |
| $\alpha$ SMA; AF488-coupled    | mouse   |       | 53-9760-82 | eBioscience/Thermo        |
| LC3A/B                         | rabbit  | D3U4C | #12741     | Cell Signaling Technology |
| PDGFR $\alpha$                 | mouse   |       | sc-398206  | Santa Cruz Biotechnology  |
| phospho-Paxillin (Tyr118)      | rabbit  |       | #2541      | Cell Signaling Technology |

#### qPCR primer sequences

| Gene              | Species | sequence (5'-->3')                                                |
|-------------------|---------|-------------------------------------------------------------------|
| <i>Rplp0 (P0)</i> | murine  | for: TGCACTCTCGCTTTCTGGAGGGTGT<br>rev: AATGCAGATGGATCAGCCAGGAAGG  |
| <i>Prkaa1</i>     | murine  | for: GGATCCAAGAGCCGAGTTGCTCACA<br>rev: TGGCTGACATGATAGCGTCTCTGTGC |
| <i>Prkaa2</i>     | murine  | for: GCCTCCACAGACACGGTCAAGTTT<br>rev: TGCTGCCAGTCAAAGAGCCAGTGAG   |
| <i>Itga1</i>      | murine  | for: AAAAGAGCTTCGTGTTCCGTGAAGCAG<br>rev: TCACCCATTCCCCTGTTGTCATTT |
| <i>Itga3</i>      | murine  | for: CCTACCCAGTCCTCAACCAGGCACA<br>rev: CTTGTTGTCTGGCCCGCACTCTTTC  |
| <i>Itga5</i>      | murine  | for: GCCACCCTTACCCAGACCCTGCTTA<br>rev: TGAGGGCAATGTGAATTGGGGAGAG  |
| <i>Itga6</i>      | murine  | for: GGAGCTGACCCTGAATCGGCAGAAG<br>rev: GGATGGGACGCAGCTTGTCTCTGAT  |
| <i>Itga7</i>      | murine  | for: GTGTGGCTGAAGCACCAACATGACC<br>rev: CACCACAATGGCCCGTAGCTTGTCT  |
| <i>Itga8</i>      | murine  | for: ATGAGGGAGAAGGGGCCTACGAAGC<br>rev: GGTCACACACCACCATCCTGGTCAC  |



| <i>Itga9</i>  | murine  | for: TTTTCTGCTGCTGGCTGTGCTCCT<br>rev: CTGGACCCAGTCCCAACCATCTTCA    |
|---------------|---------|--------------------------------------------------------------------|
| <i>Itga10</i> | murine  | for: GCTGCTCCTGCTTGCTCTCCTTGTC<br>rev: AAGGCTGCCAAAGTGGGCTTCTGAG   |
| <i>Itga11</i> | murine  | for: ATCTGGATCATCGTGGGCAGCACTC<br>rev: GTTCCCTCTTGCGCTTGGCACTTTT   |
| <i>ItgaV</i>  | murine  | for: CAGGGCTGCTGCTACTGGCTGTGTT<br>rev: GCTCTTCTTGAGGTGGTCGGACACG   |
| Gene          | Species | sequence (5'-->3')                                                 |
| <i>Itgb1</i>  | murine  | for: AGGAGAAAATGAATGCCAAGTGGGACA<br>rev: TTGGTGTGCAAATCCGCCTGAGT   |
| <i>Itgb2</i>  | murine  | for: CAGCCACCGATGTGTGAGGATTGTC<br>rev: TGCAGCGTCATACCAGCACACTGAA   |
| <i>Itgb3</i>  | murine  | for: TGAGGAAGAACGAGCCAGAGCCAAG<br>rev: CCCCCGTTAGGTGATATTGGTGAAGG  |
| <i>Itgb4</i>  | murine  | for: TGGACAATGGCAAGTCCCAGGTCTC<br>rev: CTTCCAGGTCTCCCCAGGATGGAAC   |
| <i>Itgb5</i>  | murine  | for: CCATCTGGAAGCTGCTCGTCACCAT<br>rev: GGCGAAATCGACAGTGTGTGTGGAG   |
| <i>Itgb6</i>  | murine  | for: GAACGCTCTAAGGCCAAGTGGCAAA<br>rev: AGGCCTGCTTTGTGCTTCTCCCTGT   |
| <i>Itgb7</i>  | murine  | for: AGGCTGCAAGTCACCATGTGAGCAG<br>rev: AGGGGCCAAGGTCAAGGTCACATTC   |
| <i>Itgb8</i>  | murine  | for: TGCCAGTGCTTTAGTGGCTGGGAAG<br>rev: CTGCAAACCTGGCCCTTGGAGTTGA   |
| <i>Ilk</i>    | murine  | for: TGAAGCCCTGCAGAAGAAGCCTGAA<br>rev: TTCCAGTGCCACCTTCATCCCAATC   |
| <i>Fak</i>    | murine  | for: CCTCAAATTGTCCTCCCACCCTCT<br>rev: TCTTGCTGCACCTTCTCCTCCTCCA    |
| <i>Src</i>    | murine  | for: GGTTGGCCCGGCTCATAGAAGACAA<br>rev: ACCTGCCGTACAGAGCAGCTTCAGG   |
| <i>Cfl1</i>   | murine  | for: GGCCTCTGGTGTGGCTGTCTCTGAT<br>rev: AAAGAGCACCGCCTTCTTGCGTTTC   |
| <i>Pfn1</i>   | murine  | for: GATCCGGGACTCACTGCTGCAAGAC<br>rev: GTGGACACCTTCTTGGCCATCAGC    |
| <i>Pkp1</i>   | murine  | for: TGCTTCAGCAACAGGGGTGACAAGA<br>rev: CATGAGGTTCAAGGTAGGTCCGGATGG |
| <i>Col1a1</i> | murine  | for: TGGCAAAGACGGACTCAACGGTCTC<br>rev: GAAGTCATAACCGCCACTGGGAGGTC  |
| <i>Acta2</i>  | murine  | for: CCTGGAGAAGAGCTACGAACTGCCTGA<br>rev: TTTCGTGGATGCCCGCTGACTC    |
| <i>Has2</i>   | murine  | for: ACCCTATGGTTGGAGGTGTTGGAGGA<br>rev: CACGCTGCTGAGGAAGGAGATCCAG  |
| <i>Saa1/2</i> | murine  | for: CATGCTCGGGGAACTATGATGCTG<br>rev: CTGTTGGCTTCTGGTCAGCAATGG     |
| <i>Csf3</i>   | murine  | for: TGGACTTGCTTCAGCTGGATGTTGC                                     |

|              |        |                                                                      |
|--------------|--------|----------------------------------------------------------------------|
|              |        | rev: AGGCAGAAGTGAAGGCTGGCATGG                                        |
| <i>Cxcl1</i> | murine | for: GAGGCTTGCCTTGACCCTGAAGCTC<br>rev: GTCAGAAGCCAGCGTTCACCAGACA     |
| <i>IL6</i>   | murine | for: TCCTTCCTACCCCAATTTCCAATGCTC<br>rev: GGATGGTCTTGGTCCTTAGCCACTCCT |

siRNA sequences (targeting mouse genes)

| Name                             | Target sequence       |
|----------------------------------|-----------------------|
| siCon (Qiagen's All-Star; siAll) | AAUUCUCCGAACGUGUCACGU |
| siltga1_1                        | AGGGCAAGGUGUACGUGUA   |
| siltga1_2                        | CCACAAUUGACAUCGACAA   |
| siltga1_3                        | GCCUAUGACUGGAACGGAA   |
| siltga1_4                        | CUUUAUGACGUCGUGAUU    |
| siltga3_1                        | GGACAAUGUUCGCGAUAAA   |
| siltga3_2                        | GCUACAUGAUUCAGCGGAA   |
| siltga3_3                        | AGACAUACCACAACGAGAU   |
| siltga3_4                        | GCACACUGGUUCUAGGUCU   |
| siltga5_1                        | CAAGAUGAGUUCAGCCGAU   |
| siltga5_2                        | GCUUCAACCUAGACGCGGA   |
| siltga5_3                        | UGUGAAGGACCCUCGUUUA   |
| siltga5_4                        | CAGCAAAGGCUCCCGGAUU   |
| siltga6_1                        | GUAUAUAUUUGACGGAGAA   |
| siltga6_2                        | UGGCUCACCUAGCGGGUAU   |
| siltga6_3                        | CGAGAGUUCAGUUUCGAAA   |
| siltga6_4                        | GGACCAAAGACUCGAUGUU   |
| siltga7_1                        | CGAUAUGAGUCUCGACAGA   |
| siltga7_2                        | GAAGCAAGGCUGCGGUCAA   |
| siltga7_3                        | GGGCAAGAUUGUUACGUGU   |
| siltga7_4                        | GGGCGAAAGUGCCAUGCGA   |
| siltga8_1                        | CCUAAAGGUCAGAUCGAGA   |
| siltga8_2                        | GGUCAUAAUACUAGCGAUC   |
| siltga8_3                        | GCGGUUAAGACGUCGGUUA   |
| siltga8_4                        | UCAAGAAGAUGCCGUUAAA   |
| siltga9_1                        | UGCUGAACCUACGGACAA    |
| siltga9_2                        | ACAUGGAGCCUCGAGGAA    |
| siltga9_3                        | UUUCCAGUGUUGACGAGAA   |
| siltga9_4                        | GUUGAACGAUGAAGCGAUU   |
| siltga10_1                       | GCACCGAGGUUUAGACAUC   |
| siltga10_2                       | GCUCAUACUUUGGCAGCGA   |
| siltga10_3                       | GGAUACAGAUAAAGGACGGA  |
| siltga10_4                       | GAGGAAAAGUUUUCGCUU    |
| siltga11_1                       | CCAGCGACCCUGACGACAA   |
| siltga11_2                       | GCAUCGAGUGUGUGAACGA   |
| siltga11_3                       | UCAGAAGACAGGAGACGUA   |
| siltga11_4                       | AUGGAUGAGAGGCGGUUUA   |

|           |                     |
|-----------|---------------------|
| siltgaV_1 | GUGAACAGAUGGCUGCGUA |
| siltgaV_2 | GUGAGGAACUGGUCGCCUA |
| siltgaV_3 | CCAAUUAGCAACACGGACU |
| siltgaV_4 | GCGCAAUCCUGUACGUGAA |

| Name      | Target sequence      |
|-----------|----------------------|
| siltgb1_1 | CAAUGAAGCUAUCGUGCAU  |
| siltgb1_2 | GUGAAGACAUGGACGCUUA  |
| siltgb1_3 | UUACAAGAGUGCCGUGACA  |
| siltgb1_4 | UGCCAAAUCUUGCGGAGAA  |
| siltgb2_1 | GGAAUGCACCAAGUACAAA  |
| siltgb2_2 | GUAGUUGCAAGCCCGGUUA  |
| siltgb2_3 | GGUAUGACGCUGCAGACUA  |
| siltgb2_4 | GGUCAUGGCUUCCGAGUGU  |
| siltgb3_1 | AAACAGAGCGUGUCCCGUA  |
| siltgb3_2 | AAACACGUGCUGACGCUAA  |
| siltgb3_3 | GAGCAGUCUUUCACUAUCA  |
| siltgb3_4 | GUGAAAGAGCUGACGGAUA  |
| siltgb4_1 | GCUACAACGUGGAGGGCGA  |
| siltgb4_2 | AAGUCAAGAUGGUAGACGA  |
| siltgb4_3 | GAUCAACUACUCUGCGUAU  |
| siltgb4_4 | GGAUAAUACAGCACACGGA  |
| siltgb5_1 | CCGCUUAGGUUUCGGGUCU  |
| siltgb5_2 | GCUAGGCACGCACGGAUAA  |
| siltgb5_3 | AGAAGAUCGGAUGGCGAAA  |
| siltgb5_4 | ACUGCUAAGGACUGCGUUA  |
| siltgb6_1 | GGACAUUCCUAUCCCGUAU  |
| siltgb6_2 | CGGCCAACUCAUUGAUAAA  |
| siltgb6_3 | GGAGUUGCAUCGAGUGCUA  |
| siltgb6_4 | GCUCAUCGGAGUUGUGCUA  |
| siltgb7_1 | GGACCUUCAGUGCGGGUAU  |
| siltgb7_2 | GGUCUGUGCUGACGUGAAU  |
| siltgb7_3 | ACUCAAUAGAAGGACGACUU |
| siltgb7_4 | AGAAAUCCGGGZCCGCUU   |
| siltgb8_1 | GCGGAUGGUGUGUUAAGA   |
| siltgb8_2 | GGCCAAAGUGAACACAAUA  |
| siltgb8_3 | CGUCAAGUGAGAAUGAAAU  |
| siltgb8_4 | GGAAGUGAACGUUGUGAUA  |
| siPtk2_1  | GUACAGCACUCGCGUAUCU  |
| siPtk2_2  | GCUCCAGAGUCAAUCAAUU  |
| siPtk2_3  | GGGCAUCAUUCAGAAGUAU  |
| siPtk2_4  | GAAGUUGGGUUGUUUGGAA  |
| siSrc_1   | GCUCGUGGCUUACUACUCC  |
| siSrc_2   | UCAGAUCGCUUCAGGCAUG  |

|         |                     |
|---------|---------------------|
| siSrc_3 | GGGAGCGGCUGCAGAUUGU |
| siSrc_4 | GCACGGGACAGACCGGUUA |
| silk_1  | GAAGGCACCAUUUCGUUG  |
| silk_2  | GUAAGCUCAUGAAGAUUUG |
| silk_3  | CUCAAUAGCCGCAGUGUAA |
| silk_4  | GAACAAACACUCCGUAAU  |

| Name     | Target sequence     |
|----------|---------------------|
| siCfl1_1 | CCAGAAGAAGUGAAGAAAC |
| siCfl1_2 | CAGACCUGCUCUUGGGUGU |
| siCfl1_3 | CUAACUGCUACGAGGAGGU |
| siCfl1_4 | GUGUCAUCAAGGUGUUCAA |
| siPfn1_1 | GCAAAGACCGUCAAGUUU  |
| siPfn1_2 | GGGAAUUUACAAUGGAUCU |
| siPfn1_3 | UGGAACGCCUACAUCGACA |
| siPfn1_4 | CUUCGUUAGCAUUACGCCA |
